# Supplementary material for: A key variant in the cis-regulatory element of flowering gene Ghd8 associated with cold tolerance in rice
Source: PubMed Central journal article supplement (PMC6610134; doi:10.1038/s41598-019-45794-9), 2019-07-03
Supplement: 41598_2019_45794_MOESM1_ESM.pdf [file 41598_2019_45794_MOESM1_ESM.pdf]

**A key variant in the cis-regulatory element of flowering gene *Ghd8* associated with cold tolerance in rice**

Peng Wang<sup>1,2,#</sup>, Yin Xiong<sup>1,#</sup>, Rong Gong<sup>1</sup>, Ying Yang<sup>1,2</sup>, Kai Fan<sup>1</sup>, Sabin Yu<sup>1,\*</sup>

<sup>1</sup> National Key Laboratory of Crop Genetic Improvement, College of Plant Science and Technology, Huazhong Agricultural University, Wuhan 430070, China

<sup>2</sup> Current address: Department of Agronomy and Horticulture, University of Nebraska Lincoln, Lincoln, NE 68588-0660, USA

# Contribute equally to this study

\*Author for correspondence: Sabin Yu, [ysb@mail.hzau.edu.cn](mailto:ysb@mail.hzau.edu.cn)

**Supplemental Figure and Table Legends**

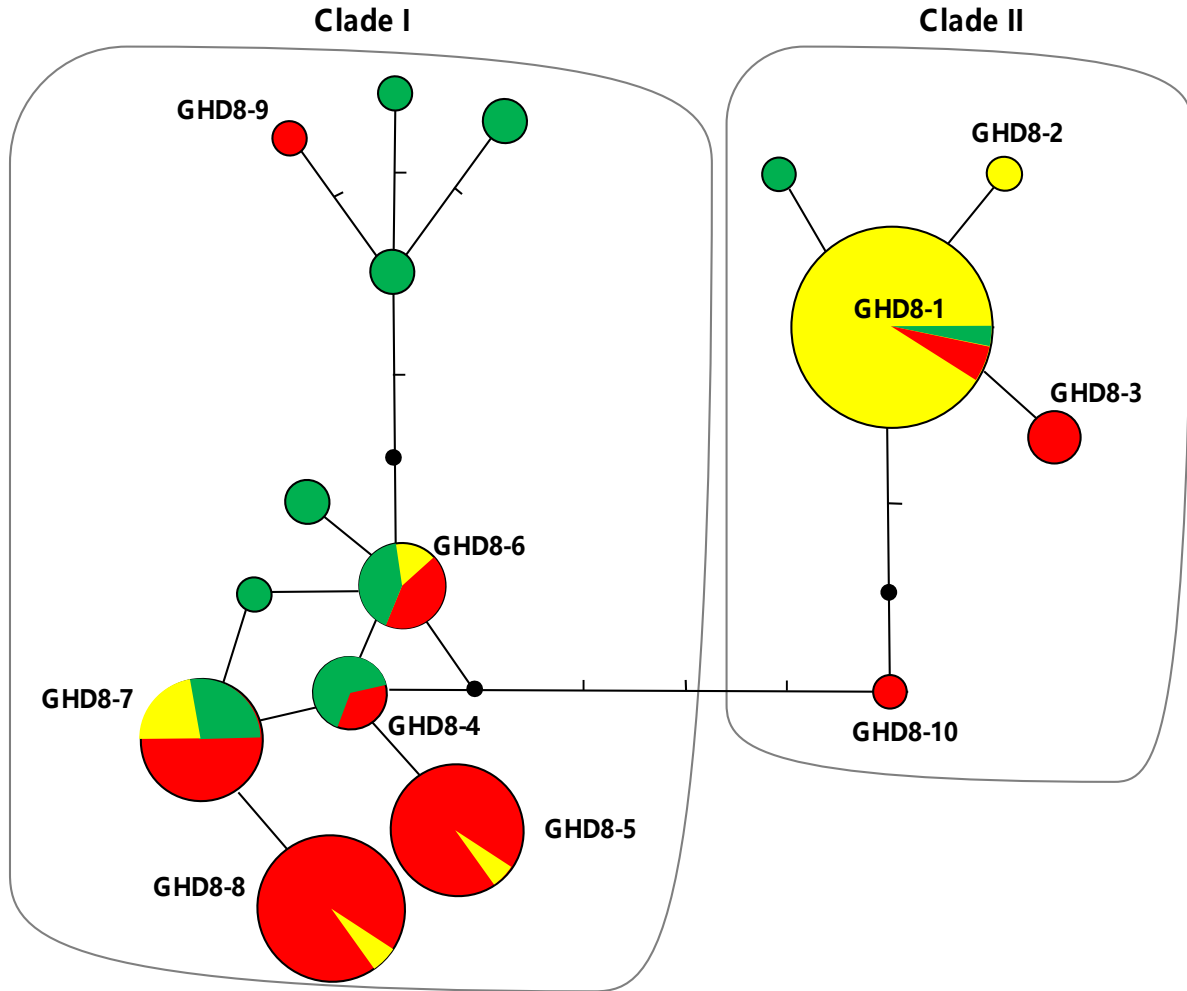

**Fig. S1** Network analysis of GHD8 proteins in both cultivated rice and wild rice. Each pie represents a haplotype, and the size of the pie is proportional to the number of lines within a given haplotype. The yellow, red and green colors in the pie indicate *japonica*, *indica* and wild rice, respectively. The scale between each pair of pies indicates the number of mutation or variation differences between each two haplotypes.

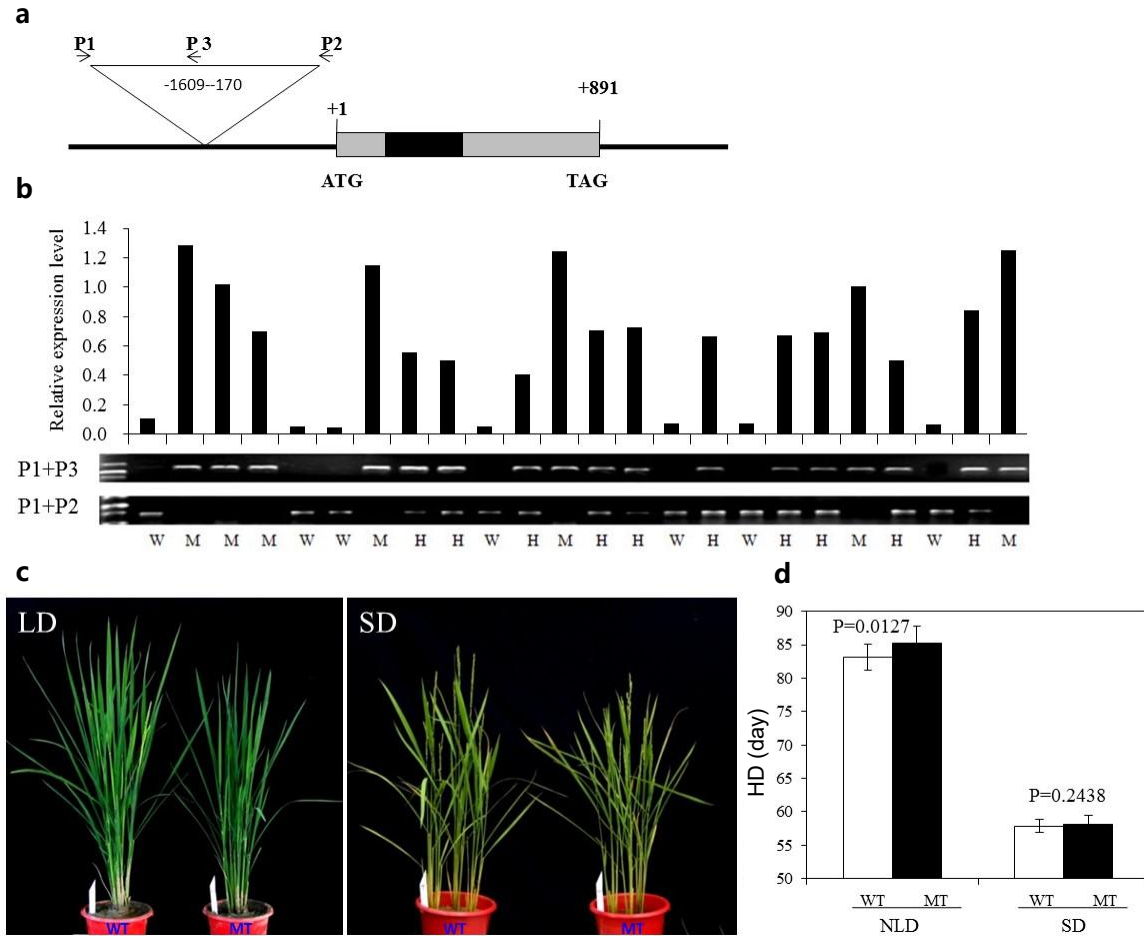

**Fig. S2** Identification of a T-DNA insertion mutant in the promoter region of *Ghd8*. (a) The insertion site shown in the promoter of *Ghd8*. P1, P2 and P3 indicate the primers for checking the genotypes in a segregating population. (b) qRT-PCR analysis for the increased expression level of *Ghd8* in the T-DNA mutants. P1+P3 for insertion fragment, P1+P2 for fragment amplified from the promoter of *Ghd8*. W: wild type, M: homozygous mutant, H: heterozygous. (c) Performances of the wild type and homozygous mutant at the flowering stage in both long-day conditions (LD) and short-day conditions (SD). (d) Heading date (HD) of WT and MT (mutant). Student's *t*-test determines significant differences between WT and MT. Error bars indicate the mean  $\pm$  SE ( $n = 15$ ).

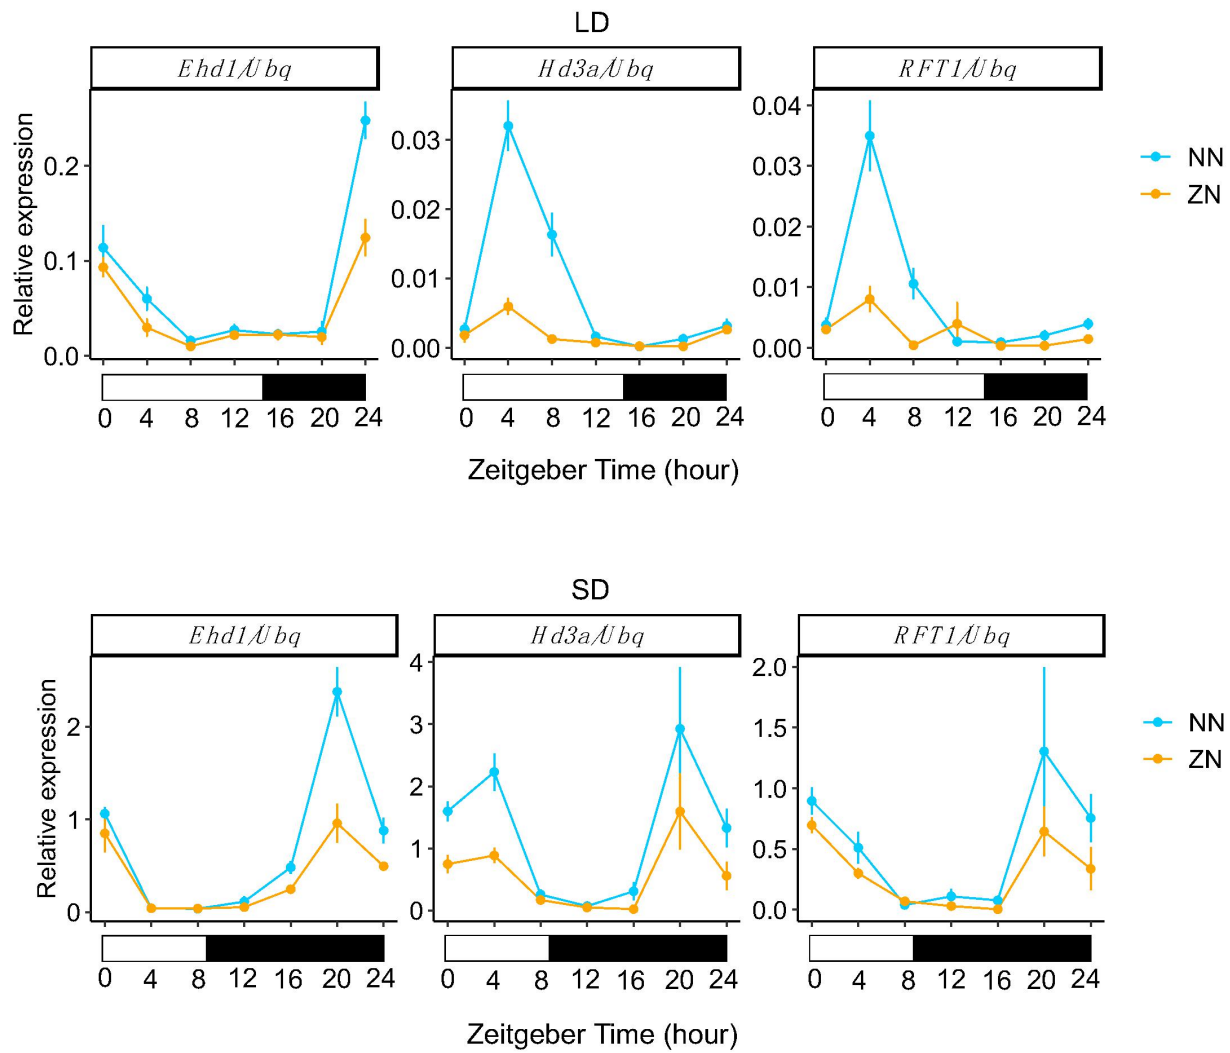

**Fig. S3** Relative expression levels of downstream flowering genes *Ehd1*, *Hd3a*, and *RFT1* in the ZN and NN rice transgenic lines under LD and SD conditions. The white and black bars under the x-axis represent light and dark periods, respectively. The zeitgeber times on the axis are corresponding to the sampling times. Leaf samples were collected every 4 h from 35-day-old plants. Error bars indicate the mean  $\pm$  SE with three replicates.

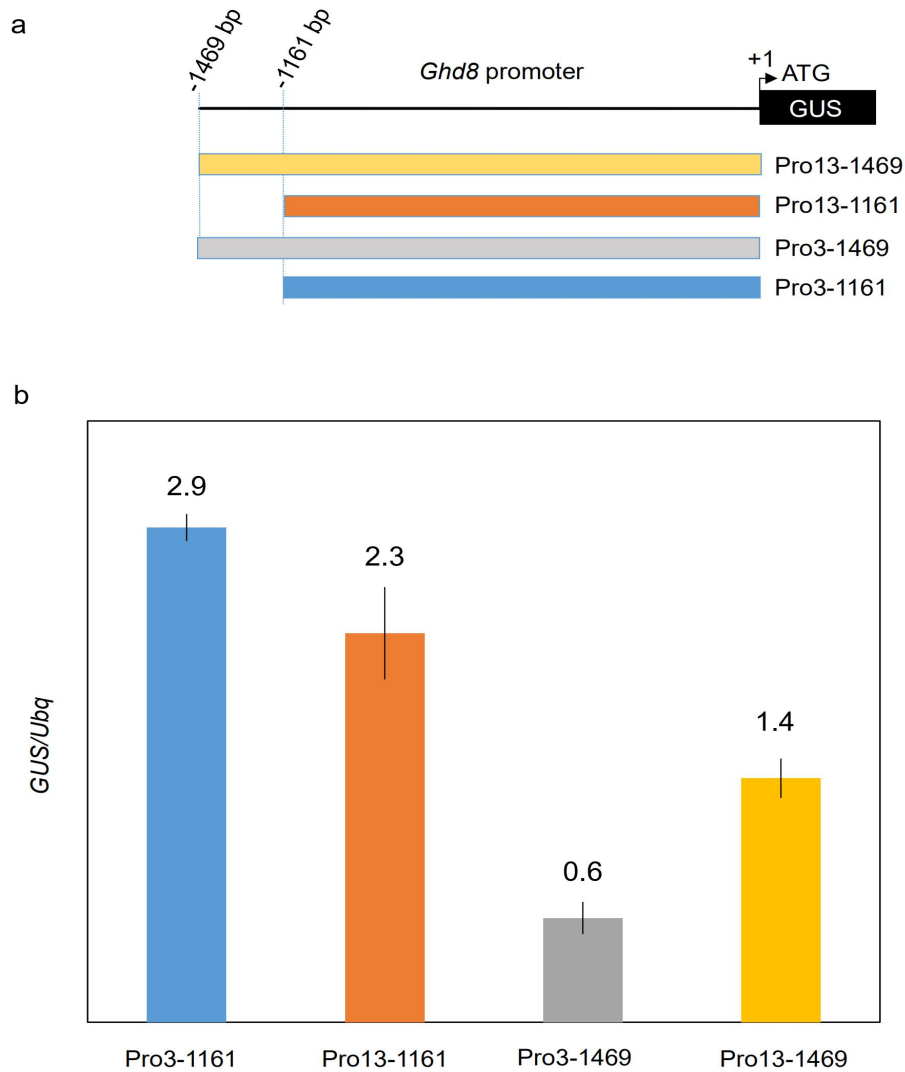

**Fig. S4** Expression analyses using *GUS* reporter driven by different truncated *Ghd8* promoters in the transgenic plants of *japonica* recipient Zhonghua11. (a) Schematic illustration of the constructs used for the *GUS* gene reporter driven by a given promoter Pro3-1469, Pro13-1469, Pro3-1161 or Pro13-1161. (b) *GUS* expression levels in the young leaves of the transgenic plants in (a).

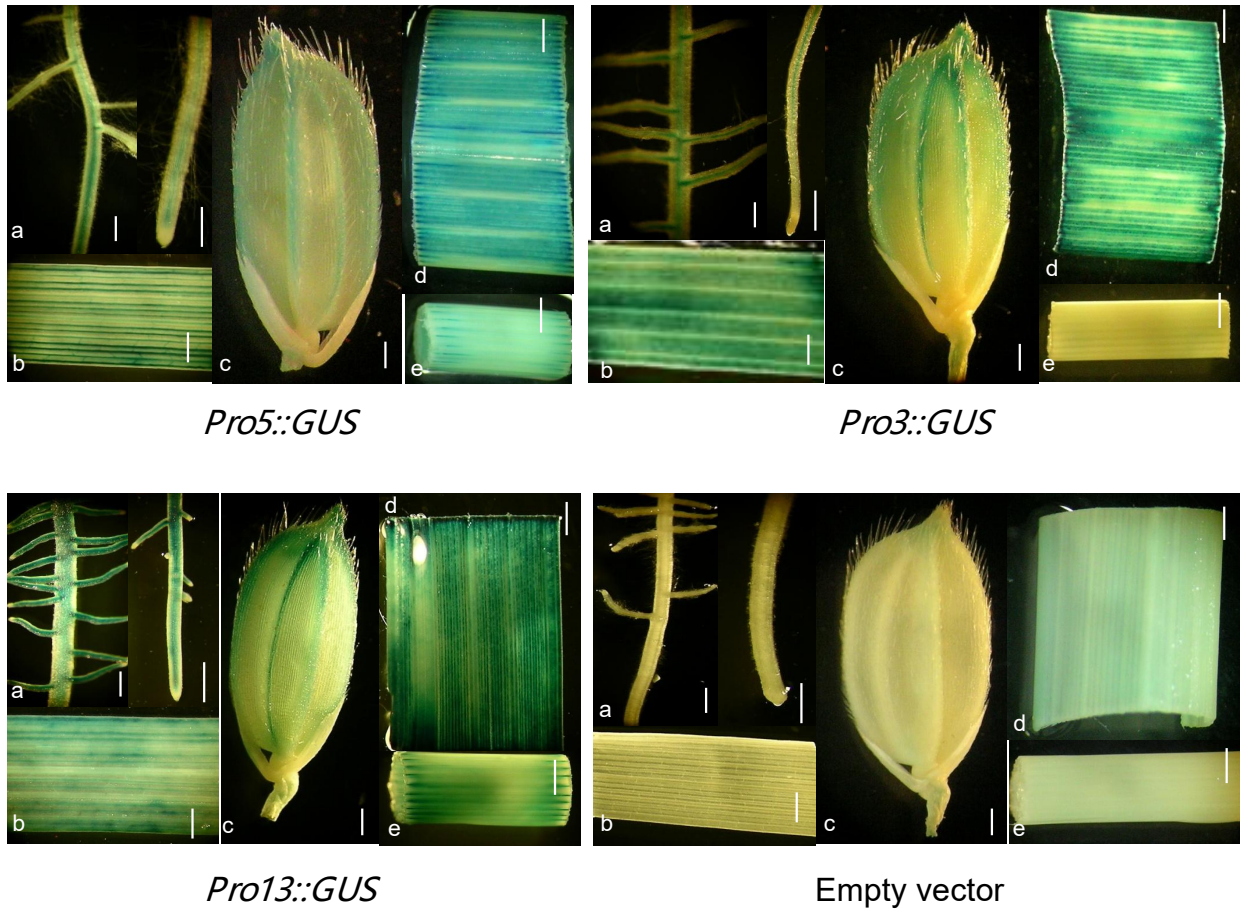

**Fig. S5** GUS ( $\beta$ -glucuronidase) staining for transgenic plants of *Pro5::GUS*, *Pro3::GUS*, *Pro13::GUS* and empty vector in HJ19 background. The lateral roots (a left, bar: 1 mm), root tip (a right, bar: 1 mm), young leaf (b, bar : 1 mm), seeds in the early filling stage (c, bar: 0.5 mm), flag leaves (d, bar: 2 mm), stem (e, bar: 0.15 mm). Photos were taken by Stereo Fluorescence Microscope Nikon SMZ800.

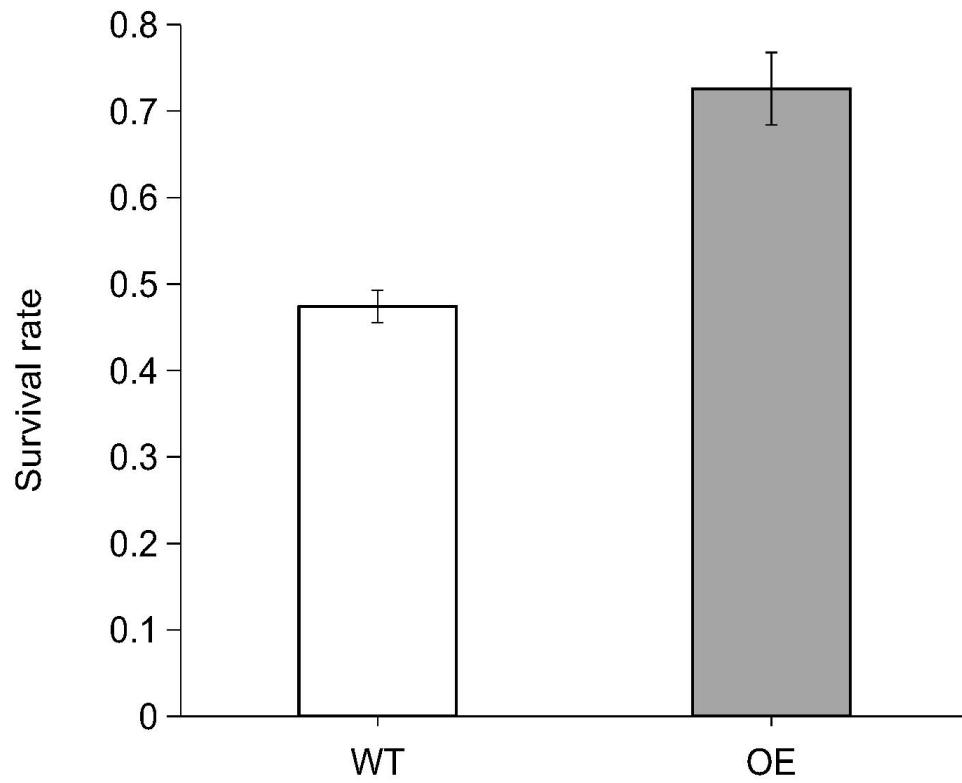

**Fig. S6** Overexpression of *Ghd8* conferring better cold tolerance relative to wild type in rice. OE: overexpression lines. WT: wild type.

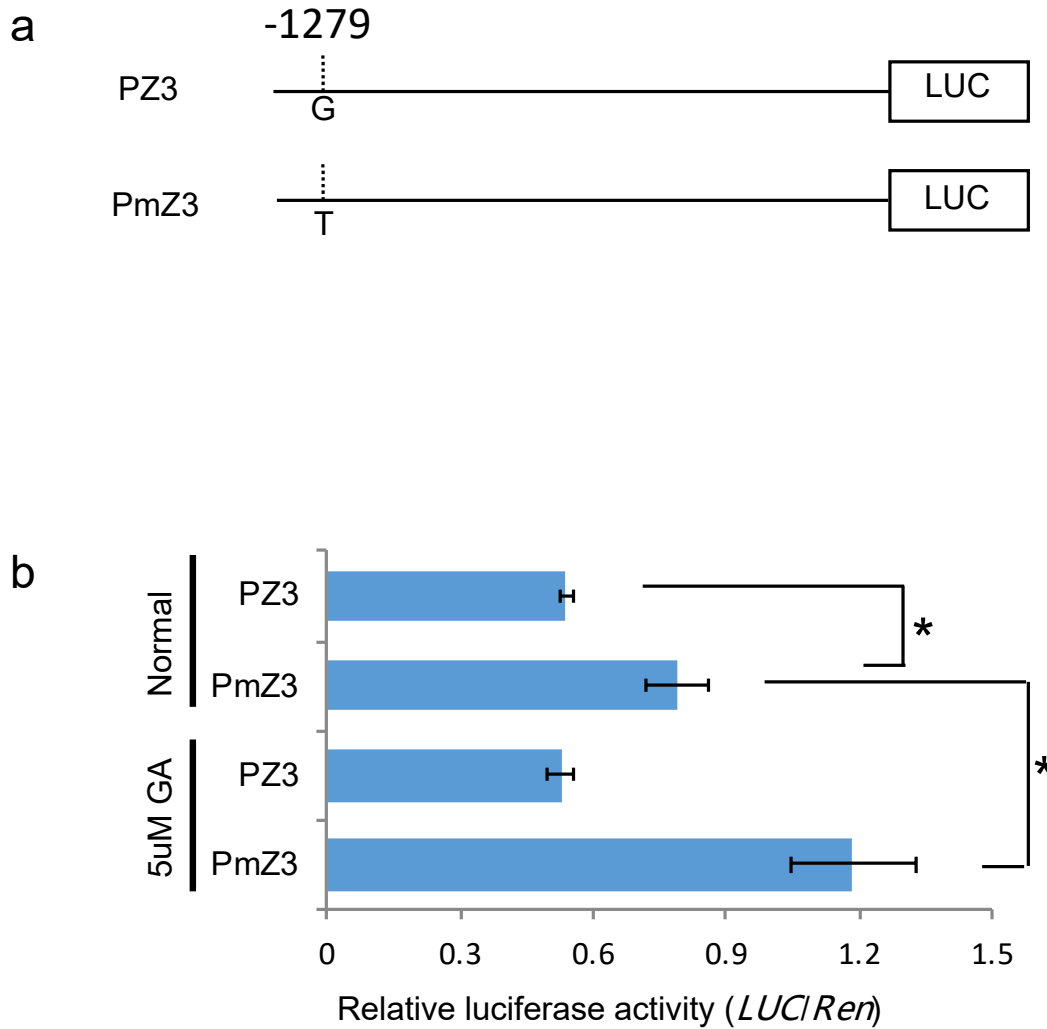

**Fig. S7** Luciferase (LUC) transient expression assays for the variant T1279G in the *Ghd8* promoter, showing the variant 1279G replacement with 1279T increases the expression level of *Ghd8*. (a) Schematic diagram of the *LUC* constructs PmZ3 (Pro3-1279T) and PZ3 (Pro3-1279G), showing the T1279G position in the promoter of *Ghd8*. (b) The promoter PmZ3 significantly increases the response to GA treatment compared with PZ3. Asterisks indicate a significant difference at  $p < 0.05$  by *t*-test.



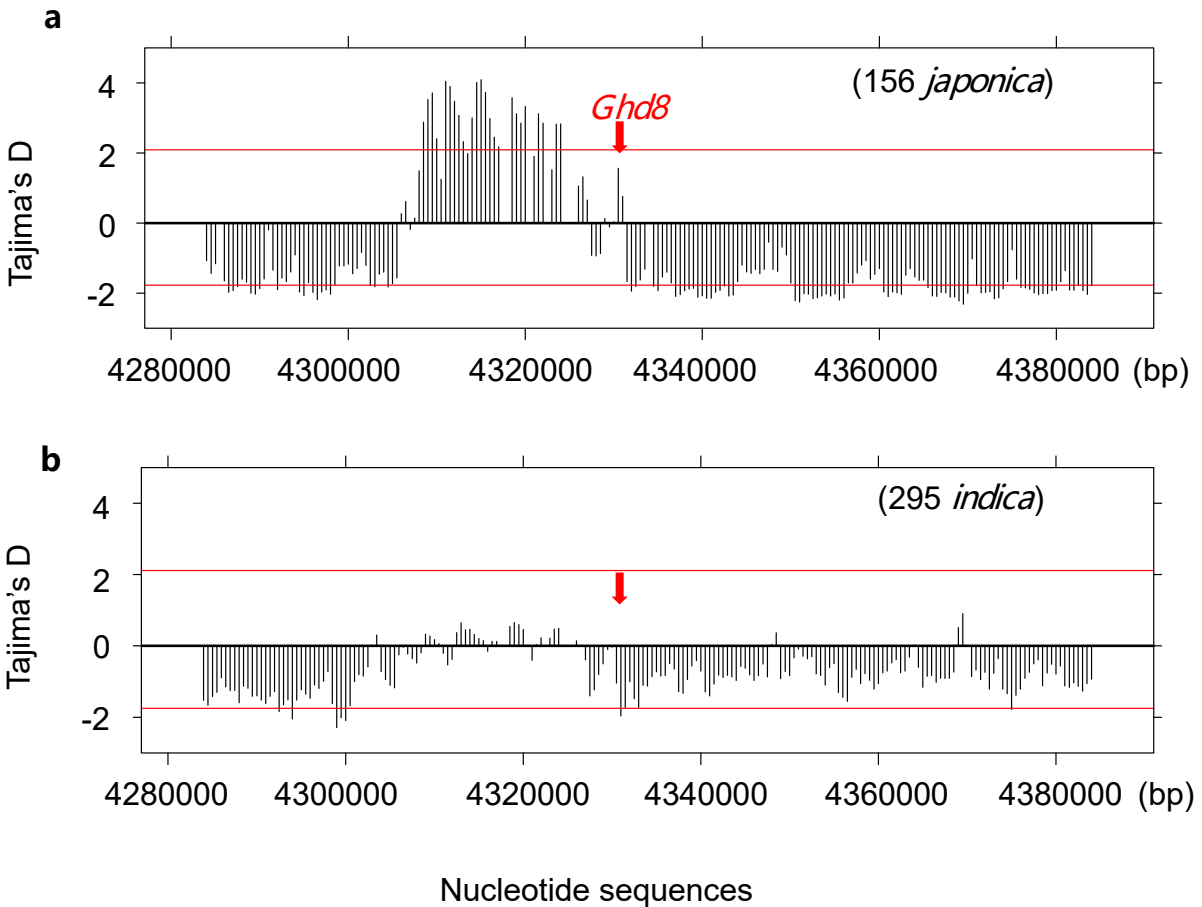

**Fig. S8** Genome region encompassing *Ghd8* in subspecies *japonica* was under strong selection. Neutrality test for the 100-kb region surrounding the *Ghd8* gene shows the high positive Tajima's D values at the 25-kb fragment harboring *Ghd8* in *japonica* rice. The nucleotide sequences of 156 *japonica* cultivars (a) and 295 *indica* cultivars (b) were downloaded from <http://ricevarmap.ncpgr.cn/>.

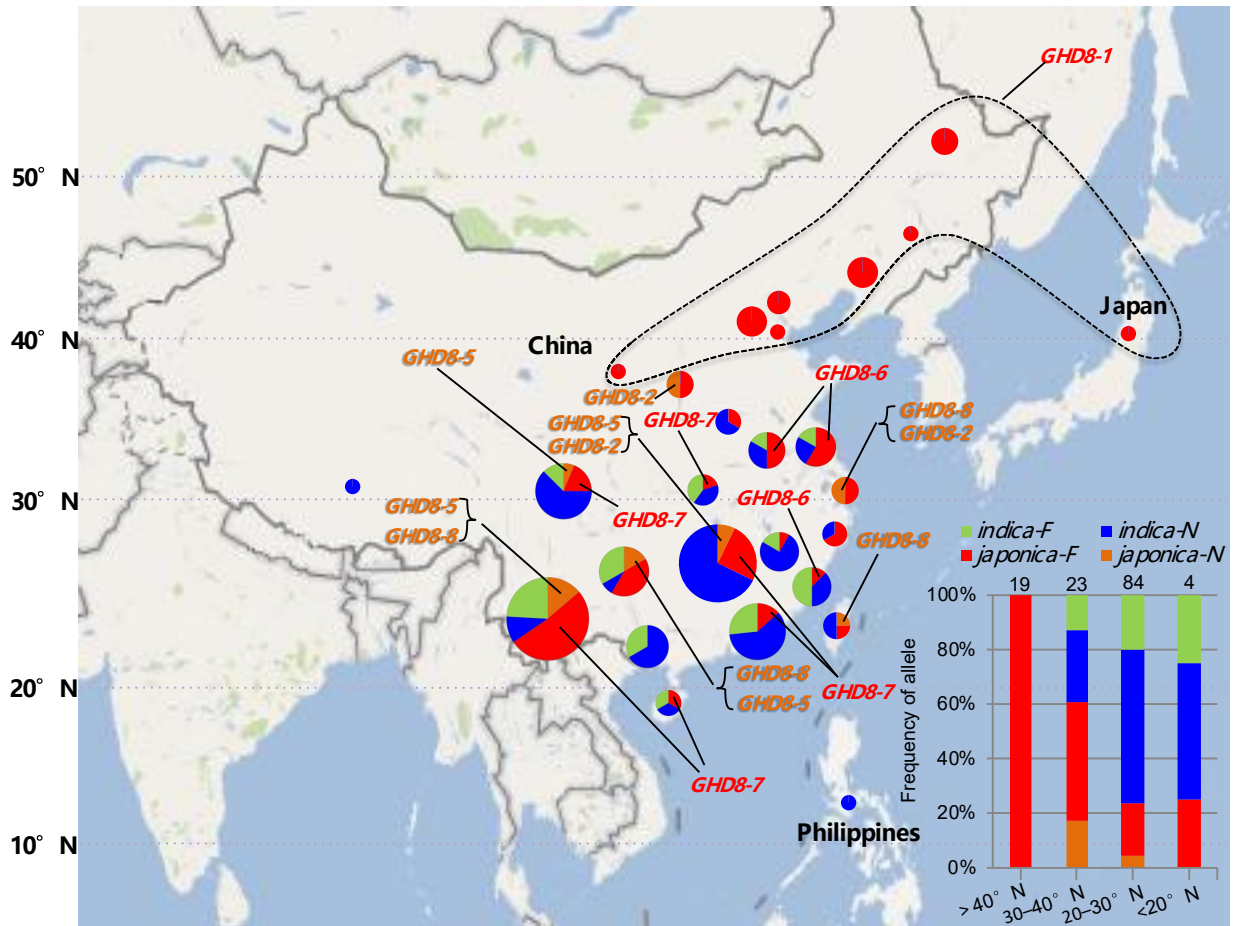

**Fig. S9** Geographic distribution of the major protein haplotypes in the 198 rice accessions. The functional characters of the *Ghd8* alleles are shown. The green and blue in both pie and bar graphs indicate the functional (F) and nonfunctional (N) alleles in *indica*; the red and orange colors represent the functional and nonfunctional alleles in *japonica*, respectively. The size of pie represents the quantity of the accessions at the indicated latitudes. The stack bars on the right corner represent the percentage of accessions that carry different alleles in four regions from high to low latitudes.

**Table S1** Information of 198 rice accessions used in this study

| Planting ID | Variety name      | Subspecies      | Alleles       | <sup>a</sup> Ghd8 function | Promoter haplotype |
|-------------|-------------------|-----------------|---------------|----------------------------|--------------------|
| 6W001       | Hejiang           | <i>japonica</i> | <i>Ghd8-1</i> | F                          | pro13              |
| 6W002       | Heijing2          | <i>japonica</i> | <i>Ghd8-1</i> | F                          | pro14              |
| 6W003       | Laoguangtou83     | <i>japonica</i> | <i>Ghd8-1</i> | F                          | pro13              |
| 6W004       | Baimaodao         | <i>japonica</i> | <i>Ghd8-1</i> | F                          | pro14              |
| 6W005       | Erjiunan 1        | <i>indica</i>   | <i>Ghd8-5</i> | N                          | pro3               |
| 6W006       | AnnongwanjingB    | <i>japonica</i> | <i>Ghd8-1</i> | F                          | pro14              |
| 6W007       | Chaoyangyihao B   | <i>indica</i>   | <i>Ghd8-8</i> | N                          | pro3               |
| 6W008       | Aijiaonante       | <i>indica</i>   | <i>Ghd8-5</i> | N                          | pro3               |
| 6W009       | L301B             | <i>indica</i>   | <i>Ghd8-5</i> | N                          | pro3               |
| 6W010       | Guangluai 4       | <i>indica</i>   | <i>Ghd8-5</i> | N                          | pro3               |
| 6W011       | Xiang aizao10     | <i>indica</i>   | <i>Ghd8-5</i> | N                          | pro3               |
| 6W012       | Jinnante 43B      | <i>indica</i>   | <i>Ghd8-5</i> | N                          | pro3               |
| 6W013       | Jing7623          | <i>japonica</i> | <i>Ghd8-8</i> | N                          | pro3               |
| 6W014       | Xiangzaoxian 7    | <i>indica</i>   | <i>Ghd8-5</i> | N                          | pro3               |
| 6W015       | 80B               | <i>indica</i>   | <i>Ghd8-5</i> | N                          | pro3               |
| 6W016       | Guangluai 15      | <i>indica</i>   | <i>Ghd8-5</i> | N                          | pro3               |
| 6W017       | ZhuzhenB          | <i>indica</i>   | <i>Ghd8-8</i> | N                          | pro3               |
| 6W018       | Baoxie123B        | <i>indica</i>   | <i>Ghd8-8</i> | N                          | pro3               |
| 6W019       | Zhenshan 97       | <i>indica</i>   | <i>Ghd8-5</i> | N                          | pro3               |
| 6W020       | Heimangdao        | <i>japonica</i> | <i>Ghd8-1</i> | F                          | pro13              |
| 6W021       | Baoxie 7B         | <i>indica</i>   | <i>Ghd8-8</i> | N                          | pro3               |
| 6W022       | JinnanteB         | <i>indica</i>   | <i>Ghd8-5</i> | N                          | pro17              |
| 6W023       | Funingzipi        | <i>japonica</i> | <i>Ghd8-1</i> | F                          | pro13              |
| 6W024       | Zhenshan97B       | <i>indica</i>   | <i>Ghd8-5</i> | N                          | pro3               |
| 6W025       | Gzhenshan97B      | <i>indica</i>   | <i>Ghd8-8</i> | N                          | pro3               |
| 6W026       | Qingsiai16B       | <i>indica</i>   | <i>Ghd8-8</i> | N                          | pro3               |
| 6W027       | LimingB           | <i>japonica</i> | <i>Ghd8-1</i> | F                          | pro13              |
| 6W028       | Nipponbare-1      | <i>japonica</i> | <i>Ghd8-1</i> | F                          | pro13              |
| 6W029       | Nanxiongzaoyou    | <i>indica</i>   | <i>Ghd8-3</i> | N                          | pro9               |
| 6W030       | Jiangnongzao1     | <i>indica</i>   | <i>Ghd8-5</i> | N                          | pro3               |
| 6W031       | Zaoshuxianghei    | <i>indica</i>   | <i>Ghd8-8</i> | N                          | pro3               |
| 6W032       | IR661-1           | <i>indica</i>   | <i>Ghd8-8</i> | N                          | pro3               |
| 6W033       | Nanjing 11        | <i>indica</i>   | <i>Ghd8-8</i> | N                          | pro3               |
| 6W034       | Weiguo            | <i>japonica</i> | <i>Ghd8-1</i> | F                          | pro13              |
| 6W035       | Gui630            | <i>indica</i>   | <i>Ghd8-8</i> | N                          | pro3               |
| 6W036       | Dianrui409B       | <i>indica</i>   | <i>Ghd8-8</i> | N                          | pro3               |
| 6W037       | Liaojing287       | <i>japonica</i> | <i>Ghd8-1</i> | F                          | pro13              |
| 6W038       | Huhui628          | <i>japonica</i> | <i>Ghd8-1</i> | F                          | pro13              |
| 6W039       | IR65482-4-136-2-2 | <i>indica</i>   | <i>Ghd8-8</i> | N                          | pro3               |
| 6W040       | JinghuB           | <i>japonica</i> | <i>Ghd8-1</i> | F                          | pro13              |
| 6W041       | 88B               | <i>indica</i>   | <i>Ghd8-8</i> | N                          | pro3               |

|       |                   |                 |               |   |       |
|-------|-------------------|-----------------|---------------|---|-------|
| 6W042 | Gu154             | <i>indica</i>   | <i>Ghd8-8</i> | N | pro3  |
| 6W043 | Nipponbare        | <i>japonica</i> | <i>Ghd8-1</i> | F | pro13 |
| 6W044 | Ninghui21         | <i>japonica</i> | <i>Ghd8-1</i> | F | pro13 |
| 6W045 | Xianghui91269     | <i>indica</i>   | <i>Ghd8-8</i> | N | pro3  |
| 6W046 | Longhuamaohu      | <i>japonica</i> | <i>Ghd8-1</i> | F | pro12 |
| 6W047 | Lucaihao          | <i>indica</i>   | <i>Ghd8-5</i> | N | pro3  |
| 6W048 | Zhonglou1         | <i>japonica</i> | <i>Ghd8-1</i> | F | pro13 |
| 6W049 | Yezhongcanghua    | <i>japonica</i> | <i>Ghd8-1</i> | F | pro13 |
| 6W050 | Shuiyuan300       | <i>japonica</i> | <i>Ghd8-1</i> | F | pro13 |
| 6W051 | Shufeng101        | <i>indica</i>   | <i>Ghd8-3</i> | N | pro13 |
| 6W052 | Chengduai 3       | <i>indica</i>   | <i>Ghd8-8</i> | N | pro3  |
| 6W053 | XiangaiB          | <i>indica</i>   | <i>Ghd8-8</i> | N | pro3  |
| 6W054 | Sankeacun         | <i>indica</i>   | <i>Ghd8-7</i> | F | pro20 |
| 6W055 | Gongju 73         | <i>japonica</i> | <i>Ghd8-5</i> | N | pro3  |
| 6W056 | Jiabala           | <i>indica</i>   | <i>Ghd8-5</i> | N | pro3  |
| 6W057 | Taishannuo        | <i>indica</i>   | <i>Ghd8-5</i> | N | pro3  |
| 6W058 | Guichao 2         | <i>indica</i>   | <i>Ghd8-5</i> | N | pro3  |
| 6W059 | 76-1              | <i>japonica</i> | <i>Ghd8-1</i> | F | pro13 |
| 6W060 | Xugunuo           | <i>japonica</i> | <i>Ghd8-5</i> | N | pro3  |
| 6W061 | Huke 3            | <i>indica</i>   | <i>Ghd8-5</i> | N | pro3  |
| 6W062 | Taizhongzailai 1  | <i>indica</i>   | <i>Ghd8-8</i> | N | pro3  |
| 6W063 | Teqingxuanhui     | <i>indica</i>   | <i>Ghd8-8</i> | N | pro3  |
| 6W064 | Huangsiguizhan    | <i>indica</i>   | <i>Ghd8-5</i> | N | pro3  |
| 6W065 | Aituogu 151       | <i>indica</i>   | <i>Ghd8-5</i> | N | pro3  |
| 6W066 | Xiangwanxian 1    | <i>indica</i>   | <i>Ghd8-8</i> | N | pro3  |
| 6W067 | Xiangwanxian3     | <i>indica</i>   | <i>Ghd8-5</i> | N | pro3  |
| 6W068 | Taizhong65        | <i>japonica</i> | <i>Ghd8-8</i> | N | pro3  |
| 6W069 | Zaoshunonghu6     | <i>japonica</i> | <i>Ghd8-1</i> | F | pro13 |
| 6W070 | Jinyou 1          | <i>indica</i>   | <i>Ghd8-5</i> | N | pro3  |
| 6W071 | Chengnongshuijing | <i>indica</i>   | <i>Ghd8-8</i> | N | pro3  |
| 6W072 | PeiC122           | <i>japonica</i> | <i>Ghd8-7</i> | F | pro3  |
| 6W073 | Minghui63         | <i>indica</i>   | <i>Ghd8-8</i> | N | pro3  |
| 6W074 | Guihuahuang       | <i>japonica</i> | <i>Ghd8-1</i> | F | pro13 |
| 6W075 | Momi              | <i>indica</i>   | <i>Ghd8-5</i> | N | pro3  |
| 6W076 | Xiushui115        | <i>japonica</i> | <i>Ghd8-1</i> | F | pro13 |
| 6W077 | Ergangai          | <i>indica</i>   | <i>Ghd8-5</i> | N | pro18 |
| 6W078 | Sanbaili          | <i>indica</i>   | <i>Ghd8-3</i> | N | pro13 |
| 6W079 | Jindao1           | <i>japonica</i> | <i>Ghd8-1</i> | F | pro13 |
| 6W080 | Xingguo           | <i>japonica</i> | <i>Ghd8-1</i> | F | pro13 |
| 6W081 | Dandongludao      | <i>japonica</i> | <i>Ghd8-1</i> | F | pro13 |
| 6W082 | Zhonghua8         | <i>japonica</i> | <i>Ghd8-1</i> | F | pro13 |
| 6W083 | Liusha 1          | <i>indica</i>   | <i>Ghd8-5</i> | N | pro3  |
| 6W084 | Bawangbian 1      | <i>japonica</i> | <i>Ghd8-7</i> | F | pro3  |
| 6W085 | Aimakang          | <i>indica</i>   | <i>Ghd8-8</i> | N | pro3  |
| 6W086 | Dongtingwanxian   | <i>indica</i>   | <i>Ghd8-7</i> | F | pro1  |

|       |                   |                 |               |   |       |
|-------|-------------------|-----------------|---------------|---|-------|
| 6W087 | JWR221            | <i>japonica</i> | <i>Ghd8-6</i> | F | pro3  |
| 6W088 | Yangdao2          | <i>indica</i>   | <i>Ghd8-6</i> | F | pro4  |
| 6W089 | 93-11             | <i>indica</i>   | <i>Ghd8-6</i> | F | pro5  |
| 6W090 | Zhengdao5         | <i>japonica</i> | <i>Ghd8-1</i> | F | pro13 |
| 6W091 | Zhenxian232       | <i>indica</i>   | <i>Ghd8-5</i> | N | pro3  |
| 6W092 | Jing87-304        | <i>japonica</i> | <i>Ghd8-1</i> | F | pro13 |
| 6W093 | Sujing2           | <i>japonica</i> | <i>Ghd8-1</i> | F | pro13 |
| 6W094 | Hongwan1          | <i>indica</i>   | <i>Ghd8-7</i> | F | pro1  |
| 6W095 | Liushizao         | <i>indica</i>   | <i>Ghd8-1</i> | F | pro13 |
| 6W096 | Taidongludao      | <i>japonica</i> | <i>Ghd8-1</i> | F | pro14 |
| 6W098 | Muxiqiu           | <i>japonica</i> | <i>Ghd8-2</i> | N | pro13 |
| 6W099 | Taizhongxianxuan2 | <i>indica</i>   | <i>Ghd8-8</i> | N | pro3  |
| 6W100 | Dangyu5           | <i>japonica</i> | <i>Ghd8-6</i> | F | pro6  |
| 6W101 | Binwan 3          | <i>japonica</i> | <i>Ghd8-7</i> | F | pro3  |
| 6W102 | Baoxuan 21        | <i>indica</i>   | <i>Ghd8-7</i> | F | pro17 |
| 6W103 | Youmangzaojing    | <i>japonica</i> | <i>Ghd8-1</i> | F | pro13 |
| 6W104 | Maguzi            | <i>japonica</i> | <i>Ghd8-1</i> | F | pro13 |
| 6W105 | Qiuqianbai        | <i>indica</i>   | <i>Ghd8-8</i> | N | pro3  |
| 6W106 | Menjiading2       | <i>indica</i>   | <i>Ghd8-5</i> | N | pro3  |
| 6W107 | Aimi              | <i>indica</i>   | <i>Ghd8-5</i> | N | pro17 |
| 6W108 | Haobayong1        | <i>japonica</i> | <i>Ghd8-1</i> | F | pro15 |
| 6W109 | Laohuzhong        | <i>japonica</i> | <i>Ghd8-1</i> | F | pro13 |
| 6W110 | Nantehao          | <i>indica</i>   | <i>Ghd8-5</i> | N | pro17 |
| 6W111 | Wanlixian         | <i>indica</i>   | <i>Ghd8-5</i> | N | pro3  |
| 6W112 | Esiniu            | <i>indica</i>   | <i>Ghd8-5</i> | N | pro3  |
| 6W113 | Jiefangdao        | <i>indica</i>   | <i>Ghd8-5</i> | N | pro3  |
| 6W114 | Cunsanli          | <i>japonica</i> | <i>Ghd8-1</i> | F | pro14 |
| 6W115 | Huangkezaonian    | <i>japonica</i> | <i>Ghd8-1</i> | F | pro13 |
| 6W116 | Nantiangangjiu    | <i>japonica</i> | <i>Ghd8-1</i> | F | pro13 |
| 6W117 | Benbanggu         | <i>japonica</i> | <i>Ghd8-8</i> | N | pro3  |
| 6W118 | Feidongtangdao    | <i>japonica</i> | <i>Ghd8-1</i> | F | pro13 |
| 6W119 | Hongqi5           | <i>japonica</i> | <i>Ghd8-1</i> | F | pro8  |
| 6W120 | Qitoubaidu        | <i>japonica</i> | <i>Ghd8-5</i> | N | pro3  |
| 6W121 | Hengxianliangchun | <i>indica</i>   | <i>Ghd8-5</i> | N | pro3  |
| 6W122 | Baikehualuo       | <i>indica</i>   | <i>Ghd8-5</i> | N | pro3  |
| 6W123 | Muguanuo          | <i>japonica</i> | <i>Ghd8-2</i> | N | pro13 |
| 6W124 | Hanmadao          | <i>indica</i>   | <i>Ghd8-8</i> | N | pro3  |
| 6W125 | Leihuozechan      | <i>indica</i>   | <i>Ghd8-5</i> | N | pro3  |
| 6W126 | Heidu4            | <i>indica</i>   | <i>Ghd8-8</i> | N | pro3  |
| 6W127 | Liuyenian         | <i>indica</i>   | <i>Ghd8-5</i> | N | pro3  |
| 6W128 | Baikezaohe        | <i>indica</i>   | <i>Ghd8-5</i> | N | pro3  |
| 6W129 | Gaoyangdiandao    | <i>japonica</i> | <i>Ghd8-1</i> | F | pro13 |
| 6W130 | Chikenuo          | <i>indica</i>   | <i>Ghd8-1</i> | F | pro13 |
| 6W131 | Aihechi           | <i>indica</i>   | <i>Ghd8-7</i> | F | pro3  |
| 6W132 | Haobuka           | <i>japonica</i> | <i>Ghd8-1</i> | F | pro14 |

|       |                 |                 |               |   |       |
|-------|-----------------|-----------------|---------------|---|-------|
| 6W133 | Haomake9(K)     | <i>japonica</i> | <i>Ghd8-1</i> | F | pro14 |
| 6W134 | Sanbangqishi    | <i>japonica</i> | <i>Ghd8-1</i> | F | pro14 |
| 6W135 | Shanjiugu       | <i>japonica</i> | <i>Ghd8-1</i> | F | pro14 |
| 6W136 | Fanhaopi        | <i>indica</i>   | <i>Ghd8-7</i> | F | pro19 |
| 6W137 | Lixinjing       | <i>japonica</i> | <i>Ghd8-1</i> | F | pro8  |
| 6W138 | Xiangnuo        | <i>japonica</i> | <i>Ghd8-1</i> | F | pro14 |
| 6W139 | Niankenuo       | <i>indica</i>   | <i>Ghd8-1</i> | F | pro16 |
| 6W140 | Yangkenuo       | <i>indica</i>   | <i>Ghd8-1</i> | F | pro13 |
| 6W141 | Guantuibaihe1   | <i>japonica</i> | <i>Ghd8-1</i> | F | pro10 |
| 6W142 | Baigedao        | <i>japonica</i> | <i>Ghd8-1</i> | F | pro13 |
| 6W143 | Tieganwu        | <i>japonica</i> | <i>Ghd8-1</i> | F | pro13 |
| 6W144 | Sanlicun        | <i>japonica</i> | <i>Ghd8-7</i> | F | pro3  |
| 6W145 | Feienuo2        | <i>indica</i>   | <i>Ghd8-1</i> | F | pro14 |
| 6W146 | Simiao          | <i>indica</i>   | <i>Ghd8-7</i> | F | pro3  |
| 6W147 | Jixuenuo        | <i>japonica</i> | <i>Ghd8-1</i> | F | pro13 |
| 6W148 | Xisheng15       | <i>japonica</i> | <i>Ghd8-1</i> | F | pro13 |
| 6W149 | Xuanenchanngtan | <i>indica</i>   | <i>Ghd8-8</i> | N | pro3  |
| 6W150 | Putaohuang      | <i>japonica</i> | <i>Ghd8-1</i> | F | pro13 |
| 6W151 | Xiangdao        | <i>indica</i>   | <i>Ghd8-8</i> | N | pro3  |
| 6W152 | Meihuanuo       | <i>indica</i>   | <i>Ghd8-8</i> | N | pro3  |
| 6W153 | Younian         | <i>japonica</i> | <i>Ghd8-5</i> | N | pro3  |
| 6W154 | Lamujia         | <i>japonica</i> | <i>Ghd8-1</i> | F | pro15 |
| 6W155 | Jinzhinuo       | <i>indica</i>   | <i>Ghd8-5</i> | N | pro3  |
| 6W156 | Magunuo         | <i>japonica</i> | <i>Ghd8-1</i> | F | pro13 |
| 6W157 | Menjiagao 1     | <i>japonica</i> | <i>Ghd8-7</i> | F | pro3  |
| 6W158 | Xiaohonggu      | <i>japonica</i> | <i>Ghd8-7</i> | F | pro3  |
| 6W159 | Jinxibai        | <i>indica</i>   | <i>Ghd8-6</i> | F | pro7  |
| 6W160 | Yanshuichi      | <i>indica</i>   | <i>Ghd8-7</i> | F | pro3  |
| 6W161 | Guihezhan       | <i>indica</i>   | <i>Ghd8-7</i> | F | pro3  |
| 6W162 | Jinbaoyin       | <i>japonica</i> | <i>Ghd8-6</i> | F | pro7  |
| 6W163 | Hongainuo       | <i>indica</i>   | <i>Ghd8-7</i> | F | pro3  |
| 6W164 | Aizaizhan       | <i>indica</i>   | <i>Ghd8-7</i> | F | pro1  |
| 6W165 | Dawannuo        | <i>indica</i>   | <i>Ghd8-7</i> | F | pro17 |
| 6W166 | Baoerfu         | <i>indica</i>   | <i>Ghd8-6</i> | F | pro7  |
| 6W167 | Zhongnong 4     | <i>indica</i>   | <i>Ghd8-5</i> | N | pro3  |
| 6W168 | Laohongdao      | <i>japonica</i> | <i>Ghd8-2</i> | N | pro10 |
| 6W169 | Wuzidui         | <i>japonica</i> | <i>Ghd8-1</i> | F | pro14 |
| 6W170 | Xibainian       | <i>japonica</i> | <i>Ghd8-5</i> | N | pro3  |
| 6W171 | Dongtingwanxian | <i>indica</i>   | <i>Ghd8-7</i> | F | pro3  |
| 6W172 | Mibeiwaxian     | <i>indica</i>   | <i>Ghd8-7</i> | F | pro1  |
| 6W173 | Babaili         | <i>japonica</i> | <i>Ghd8-1</i> | F | pro14 |
| 6W174 | Hongmisandan    | <i>japonica</i> | <i>Ghd8-1</i> | F | pro13 |
| 6W175 | Qiyuexian       | <i>indica</i>   | <i>Ghd8-7</i> | F | pro3  |
| 6W176 | Qimei           | <i>indica</i>   | <i>Ghd8-7</i> | F | pro1  |
| 6W177 | Yuyannuo        | <i>japonica</i> | <i>Ghd8-1</i> | F | pro11 |

|       |                |                 |               |   |       |
|-------|----------------|-----------------|---------------|---|-------|
| 6W178 | Zhegu          | <i>japonica</i> | <i>Ghd8-8</i> | N | pro3  |
| 6W179 | Maweizhan      | <i>indica</i>   | <i>Ghd8-5</i> | N | pro3  |
| 6W180 | Mamagu         | <i>indica</i>   | <i>Ghd8-8</i> | N | pro3  |
| 6W181 | Cungunuo       | <i>indica</i>   | <i>Ghd8-1</i> | F | pro10 |
| 6W182 | Zinuo          | <i>indica</i>   | <i>Ghd8-5</i> | N | pro3  |
| 6W183 | Lengshuigu2    | <i>japonica</i> | <i>Ghd8-1</i> | F | pro14 |
| 6W184 | Qingke         | <i>indica</i>   | <i>Ghd8-4</i> | F | pro8  |
| 6W185 | Banjiemang     | <i>japonica</i> | <i>Ghd8-1</i> | F | pro12 |
| 6W186 | Beizinuo       | <i>japonica</i> | <i>Ghd8-7</i> | F | pro3  |
| 6W187 | Wuzuihonggu    | <i>indica</i>   | <i>Ghd8-7</i> | F | pro3  |
| 6W189 | Nangaogu       | <i>indica</i>   | <i>Ghd8-7</i> | F | pro3  |
| 6W190 | Hongkezhenuo   | <i>japonica</i> | <i>Ghd8-1</i> | F | pro14 |
| 6W191 | Mowanggunie    | <i>japonica</i> | <i>Ghd8-7</i> | F | pro3  |
| 6W193 | Haoluguangnian | <i>japonica</i> | <i>Ghd8-1</i> | F | pro14 |
| 6W194 | Haocai         | <i>indica</i>   | <i>Ghd8-7</i> | F | pro3  |
| 6W195 | Honggu         | <i>indica</i>   | <i>Ghd8-1</i> | F | pro14 |
| 6W196 | Zimi           | <i>japonica</i> | <i>Ghd8-5</i> | N | pro3  |
| 6W197 | Qitougu        | <i>indica</i>   | <i>Ghd8-7</i> | F | pro2  |
| 6W198 | Xianggu        | <i>japonica</i> | <i>Ghd8-7</i> | F | pro3  |

<sup>a</sup> The coding region of *Ghd8* from 198 accessions were sequenced by using the specific primers described in Yan et al., 2011. F or N represents functional or nonfunctional alleles, respectively.

**Table S2** Information of promoter and protein types of *Ghd8*

| Promoter Haplotype <sup>a</sup> | No. of <i>indica</i> | No. of <i>japonica</i> | Representative accessions | Protein haplotype                                       |
|---------------------------------|----------------------|------------------------|---------------------------|---------------------------------------------------------|
| <i>Pro9</i>                     | 1                    |                        | Nanxiongzaoyou            | <b>GHD8-3</b>                                           |
| <i>Pro14</i>                    | 2                    | 15                     | Babaili                   | GHD8-1                                                  |
| <i>Pro16</i>                    | 1                    |                        | Zhankenuo                 | GHD8-1                                                  |
| <i>Pro15</i>                    |                      | 2                      | Haobayong1                | GHD8-1                                                  |
| <i>Pro13</i>                    | 5                    | 43                     | Nipponbare                | GHD8-1, <b>GHD8-2, GHD8-3</b>                           |
| <i>Pro12</i>                    |                      | 2                      | Banjiemang                | GHD8-1                                                  |
| <i>Pro10</i>                    | 1                    | 2                      | Guantuibaihe1             | GHD8-1, <b>GHD8-2</b>                                   |
| <i>Pro11</i>                    |                      | 1                      | Yuyannuo                  | GHD8-1                                                  |
| <i>Pro1</i>                     | 5                    |                        | Dongtingwanxian           | GHD8-7                                                  |
| <i>Pro17</i>                    | 5                    |                        | Ergangai                  | <b>GHD8-5</b> , GHD8-7                                  |
| <i>Pro3</i>                     | 77                   | 22                     | ZS97                      | <b>GHD8-5</b> , GHD8-6, GHD8-7, <b>GHD8-8</b> , GHD8-10 |
| <i>Pro2</i>                     | 1                    |                        | Qitougu                   | GHD8-7                                                  |
| <i>Pro18</i>                    | 1                    |                        | JinnanteB                 | <b>GHD8-5</b>                                           |
| <i>Pro8</i>                     | 1                    | 2                      | Qingke                    | GHD8-1, GHD8-4                                          |
| <i>Pro7</i>                     | 2                    | 1                      | Jinxibai                  | GHD8-6                                                  |
| <i>Pro5</i>                     | 1                    |                        | 93-11                     | GHD8-6                                                  |
| <i>Pro6</i>                     |                      | 1                      | Dangyu5hao                | GHD8-6                                                  |
| <i>Pro4</i>                     | 1                    |                        | Yangdao2hao               | GHD8-6                                                  |
| <i>Pro20</i>                    | 1                    |                        | Sankecun                  | GHD8-7                                                  |
| <i>Pro19</i>                    | 1                    |                        | Fanhaopi                  | GHD8-7                                                  |

<sup>a</sup> Two clusters of the promoter haplotypes of *Ghd8* are indicated in Fig. S1. Several protein haplotypes linked with the promoter types are shown. The protein types in the red color font are highlighted as nonfunctional.



**Table S3** Nucleotide diversity analysis in promoter, coding region and 3' UTR region of *Ghd8*

| Parameters <sup>a</sup>          | Categories      | Entire region | Non-coding |           | Coding regions |
|----------------------------------|-----------------|---------------|------------|-----------|----------------|
|                                  |                 |               | Promoter   | 3' region |                |
| Length (bp)                      |                 | 4009          | 1843       | 1263      | 903            |
| No. of Indels                    | <i>indica</i>   | 9             | 4          | 2         | 3              |
|                                  | <i>japonica</i> | 13            | 3          | 6         | 4              |
|                                  | cultivated rice | 13            | 3          | 6         | 4              |
|                                  | Wild rice       | 35            | 16         | 14        | 5              |
| No. of SNP                       | <i>indica</i>   | 33            | 18         | 6         | 9              |
|                                  | <i>japonica</i> | 54            | 19         | 25        | 10             |
|                                  | cultivated rice | 62            | 21         | 31        | 10             |
|                                  | Wild rice       | 235           | 63         | 144       | 28             |
| $\pi$ /bp                        | <i>indica</i>   | 0.0022        | 0.0016     | 0.0056    | 0.0027         |
|                                  | <i>japonica</i> | 0.0039        | 0.0030     | 0.0089    | 0.0045         |
|                                  | cultivated rice | 0.005         | 0.0035     | 0.0109    | 0.0053         |
|                                  | Wild rice       | 0.0165        | 0.0078     | 0.0362    | 0.0053         |
| $\theta$ /bp                     | <i>indica</i>   | 0.0025        | 0.0022     | 0.0057    | 0.0024         |
|                                  | <i>japonica</i> | 0.0027        | 0.0022     | 0.0075    | 0.0025         |
|                                  | cultivated rice | 0.0027        | 0.0021     | 0.0065    | 0.0021         |
|                                  | Wild rice       | 0.0151        | 0.0085     | 0.0293    | 0.0079         |
| Tajima's D                       | <i>indica</i>   | -0.4402       | -0.7573    | 0.042     | -0.0235        |
|                                  | <i>japonica</i> | 1.4617        | 1.1494     | 0.5064    | 2.2785*        |
|                                  | cultivated rice | 2.6867*       | 1.9324*    | 1.6643    | 3.6984**       |
|                                  | Wild rice       | 0.3497        | -0.3036    | 0.9091    | -1.1817        |
| $\pi_{indica}/\pi_{rufipogon}$   |                 | 0.1333        | 0.2051     | 0.1575    | 0.4528         |
| $\pi_{japonica}/\pi_{rufipogon}$ |                 | 0.2364        | 0.3846     | 0.2459    | 0.8491         |
| $\pi_{Cultivar}/\pi_{rufipogon}$ |                 | 0.3030        | 0.4487     | 0.3011    | 1.0000         |

<sup>a</sup> The diversity analysis was performed by using DnaSP 5.10 to across 30 wild rices (*O. rufipogon*), 46 *japonica* and 48 *indica* varieties. Cultivated rice (*Oryza sativa*) means the total of *japonica* and *indica* varieties used. \*\* P < 0.02, \* P < 0.05.

**Table S4** Primers used in this study

| Name           | Sequences (5'-3')          | Remark                    |
|----------------|----------------------------|---------------------------|
| P1-Ghd8        | GCAAGTGCCCATAGCTCTTC       | identify insertion mutant |
| P3-Ghd8        | TATATGCACTCGCAGATGCC       | identify insertion mutant |
| P2-Ghd8        | TTGGGGTTTCTACAGGACGTAAC    | identify insertion mutant |
| Ubq-Forward    | AACCAGCTGAGGCCCAAGA        | qRT-PCR internal control  |
| Ubq-Reverse    | ACGATTGATTTAACCAGTCCATGA   | qRT-PCR internal control  |
| Hd3a-Forward   | CTTCAACACCAAGGACTTCGC      | qRT-PCR                   |
| Hd3a-Reverse   | TAGTGAGCATGCAGCAGATCG      | qRT-PCR                   |
| Ghd8-Forward   | TCGCCGACTCGTTGTCCAAC       | qRT-PCR                   |
| Ghd8-Reverse   | AGAGTAGGAAGAGCTATGGGC      | qRT-PCR                   |
| Ehd1-Forward   | GGATGCAAGGAAATCATGGA       | qRT-PCR                   |
| Ehd1-Reverse   | AATCCCATCGGAAATCTTGG       | qRT-PCR                   |
| RFT1-Forward   | TGACCTAGATTCAAAGTCTAATCCTT | qRT-PCR                   |
| RFT1-Reverse   | TGCCGGCCATGTCAAATTAATAAC   | qRT-PCR                   |
| DREB1a-Forward | ACCTGTACTACGCGAGCTTG       | qRT-PCR                   |
| DREB1a-Reverse | TAGTAGCTCCAGAGTGGGAC       | qRT-PCR                   |
| DREB1b-Forward | GATGGCGACGAAGAAGAAGA       | qRT-PCR                   |
| DREB1b-Reverse | GAACCTGAACCCGTCGTC         | qRT-PCR                   |
| AOX1b-Forward  | TCAACCATTTGCGATCGG         | qRT-PCR                   |
| AOX1b-Reverse  | TCGCCCGTTGATGAATGA         | qRT-PCR                   |
| H3b-Forward    | AGTGTGTCTCCGAGTTCAT        | identify hap3b            |
| H3b-Reverse    | TAGTCATAGCCCAGAGCAAA       | identify hap3b            |
| SOC-Forward    | CTGAGGCATACTAAGGATCG       | qRT-PCR                   |
| SOC-Reverse    | GAACAAGGTAACCCAATGAA       | qRT-PCR                   |
| FT-Forward     | AGACGTTCTTGATCCGTTTA       | qRT-PCR                   |
| FT-Reverse     | GTAGATCTCAGCAAACCTCGC      | qRT-PCR                   |
| Actin-Forward  | GTTGCACCACCTGAAAGGAAG      | qRT-PCR internal control  |
| Actin-Reverse  | CAATGGGACTAAAACGCAAAA      | qRT-PCR                   |
| GUS-Forward    | ACGGCCTGTGGGCATTC          | qRT-PCR                   |
| GUS-Reverse    | GCGCTTTCCCAACG             | qRT-PCR                   |
| PC-7-Forward   | GTAGCGGTTGAGGTAGGA         | generating constructs     |
| PC-7-Reverse   | GAGCACCTTGATAGATAAG        | Generating constructs     |
| PC29-Forward   | TACCCGATCACCTTTCATG        | generating constructs     |
| PC29-Reverse   | TGCACTCGCAGATGCCATC        | generating constructs     |
| 34-Forward     | CTGATTGGATTTGGATCACAACC    | generating constructs     |
| 30-Reverse     | TCAGCTTCGTTACAGGCGA        | generating constructs     |

|                |                                      |                    |
|----------------|--------------------------------------|--------------------|
| PC29-Forward   | TACCCGATCACCTTTCATG                  | Resequencing Ghd8  |
| PC29-Reverse   | TGCACTCGCAGATGCCATC                  | Resequencing Ghd8  |
| PC-3-Forward   | AGTGGCATTGATGCACTGC                  | Resequencing Ghd8  |
| PC-3-Reverse   | CAGGCTTCTTATGTTTCAC                  | Resequencing Ghd8  |
| PC-7-Forward   | GTAGCGGTTGAGGTAGGA                   | Resequencing Ghd8  |
| PC-7-Reverse   | GAGCACCTTGATAGATAAG                  | Resequencing Ghd8  |
| PC34-Forward   | CTGATTGGATTTGGATCACAAACC             | Resequencing Ghd8  |
| PC30-Reverse   | TCAGCTTCGTTACAGGCGA                  | Resequencing Ghd8  |
| PC33-Forward   | TCCGAATGTCTAGTTCCCCACCG              | Resequencing Ghd8  |
| PC55CR-Reverse | CATCAGCTTCGTTACAGGCGAG               | Resequencing Ghd8  |
| PGhd8F1        | AAAGGATCCGTGAAGCTAACAACACTAGC        | truncated promoter |
| PGhd8R1        | AAAAAGCTTTGCACTCGCAGATGCCATC         | truncated promoter |
| PGhd8R2        | AAAAAGCTTTTTCAACCTTAAGCTTCTG         | truncated promoter |
| PNGhd8R4       | AAAAAGCTTCTGCCTTTTCCTTTTATGAAAATGCAC | truncated promoter |
| PZGhd8R3       | AAAAAGCTTCTGCCTTTTCCTTTGATG          | truncated promoter |

---
